# Supplementary material for: Signal transduction mechanisms in heme-based globin-coupled oxygen sensors with a focus on a histidine kinase (AfGcHK) and a diguanylate cyclase (YddV or EcDosC)
Source: publisher site journal article supplement (doi:10.1515/hsz-2022-0185), 2022-09-27
Supplement: Supplementary file 1 [file j_hsz-2022-0185_suppl.docx]

**Signal transduction mechanisms in heme-based globin-coupled oxygen sensors with a focus on a histidine kinase (*Af*GcHK) and a diguanylate cyclase (YddV or *Ec*DosC)**

Jakub Vávra, Artur Sergunin, Petr Jeřábek, Toru Shimizu and Markéta Martínková

**Supplementary material**

**Table S1**: Origin and functions of heme-based oxygen sensors.

| Heme-based oxygen sensora | Origin | Functionsb | Reference |
| --- | --- | --- | --- |
| Globin fold (GCS) |  |  |  |
| HemAT | *Bacillus subtilis* | MCP | (Aono et al. 2002) |
| YddV (*Ec*DosC) | *Escherichia coli* | DGC | (Lengalova et al. 2019) |
| *Af*GcHK | *Anaeromyxobacter* sp. Fw109-5 | HK, TCS with RR | (Stranava et al. 2017) |
| HemDGC | *Desulfotalea psychrophila* | DGC | (Sawai et al. 2010) |
| *Av*GReg | *Azotobacter vinelandii* | DGC | (Germani et al. 2020) |
| *Bpe*GReg | *Bordetella pertussis* | DGC | (Germani et al. 2020; Walker et al. 2020) |
| *Gs*GCS | *Geobacter sulfurreducens* | putative membrane-bound transport | (Hammerschmid et al. 2021) |
| HemAC-*Lm* | *Leishmania major* | adenylate cyclase | (Sen Santara et al. 2013) |
| *Ec*GReg | *Escherichia coli* | DGC | (Wan et al. 2017) |
| DcpG | *Paenibacillus dendritiformis* | DGC, PDE (bifunctional) | (Patterson et al. 2021a, 2021b) |
| *Pcc*GCS | *Pectobacterium carotovorum* | DGC | (Rivera et al. 2016; Walker et al. 2020) |
| PAS fold |  |  |  |
| *Rm*FixL | *Rhizobium meliloti* | HK, TCS with FixJ | (Miyatake et al. 2000) |
| *Bj*FixL | *Bradyrhizobium japonicum* | HK, TCS with FixJ | (Hao et al. 2002) |
| *Ec*DOS (*Ec*DosP) | *Escherichia coli* | PDE | (Yan et al. 2015) |
| *Ax*PDEA1 | *Acetobacter xylinum* | PDE | (Chang et al. 2001) |
| *Pa*Aer2 | *Pseudomonas aeruginosa* | MCP | (Orillard et al. 2021) |
| *Vc*Aer2 | *Vibrio cholerae* | MCP | (Greer‐Phillips et al. 2018) |
| ThkA | *Thermotoga maritima* | HK, TCS with TrrA | (Yamada et al. 2006) |
| GAF fold |  |  |  |
| DosS (DevS) | *Mycobacterium tuberculosis* | HK, TCS with DosR (DevR) | (Kumari et al. 2020; Zheng et al. 2020) |
| DosT | *Mycobacterium tuberculosis* | HK, TCS with DosR (DevR) | (Sousa et al. 2007, 2020) |
| Other types of fold |  |  |  |
| AppA | *Rhodobacter sphaeroides* | transcriptional regulation with PpsR | (Moskvin et al. 2007) |
| Gyc-88E | *Drosophila melanogaster* | GC | (Huang et al. 2007) |
| *Ct* H-NOX | *Caldanaerobacter tengcongensis* | putative MCP | (Petrova et al. 2021) |

aHemDGC: heme-containing diguanylate cyclase, *Pcc*GCS: globin coupled sensor from *Pectobacterium carotovorum* ssp. *Carotovorum*, *Pa*Aer2: aerotaxis transducer from *Pseudomonas aeruginosa*, *Vc*Aer2: aerotaxis transducer from *Vibrio cholerae*, *Ct* H-NOX: heme nitric oxide/oxygen binding sensor from *Caldanaerobacter tengcongensis.*

bMCP: methyl-accepting chemotaxis, DGC: diguanylate cyclase, HK: histidine kinase, TCS: two-component system, RR: response regulator, PDE: phosphodiesterase, GC: guanylate cyclase.

**References**

Aono, S., Kato, T., Matsuki, M., Nakajima, H., Ohta, T., Uchida, T., and Kitagawa, T. (2002). Resonance Raman and Ligand Binding Studies of the Oxygen-sensing Signal Transducer Protein HemAT from Bacillus subtilis. J. Biol. Chem. 277: 13528–13538.

Chang, A.L., Tuckerman, J.R., Gonzalez, G., Mayer, R., Weinhouse, H., Volman, G., Amikam, D., Benziman, M., and Gilles-Gonzalez, M.-A. (2001). Phosphodiesterase A1, a Regulator of Cellulose Synthesis in Acetobacter xylinum , Is a Heme-Based Sensor. Biochemistry 40: 3420–3426.

Germani, F., Nardini, M., De Schutter, A., Cuypers, B., Berghmans, H., Van Hauwaert, M.-L., Bruno, S., Mozzarelli, A., Moens, L., Van Doorslaer, S., et al. (2020). Structural and Functional Characterization of the Globin-Coupled Sensors of Azotobacter vinelandii and Bordetella pertussis. Antioxid Redox Signal 32: 378–395.

Greer‐Phillips, S.E., Sukomon, N., Chua, T.K., Johnson, M.S., Crane, B.R., and Watts, K.J. (2018). The Aer2 receptor from Vibrio cholerae is a dual PAS‐heme oxygen sensor. Mol. Microbiol. 109: 209–224.

Hammerschmid, D., Germani, F., Drusin, S.I., Fagnen, C., Schuster, C.D., Hoogewijs, D., Marti, M.A., Venien-Bryan, C., Moens, L., Van Doorslaer, S., et al. (2021). Structural modeling of a novel membrane-bound globin-coupled sensor in Geobacter sulfurreducens. Comput. Struct. Biotechnol. J. 19: 1874–1888.

Hao, B., Isaza, C., Arndt, J., Soltis, M., and Chan, M.K. (2002). Structure-Based Mechanism of O 2 Sensing and Ligand Discrimination by the FixL Heme Domain of Bradyrhizobium japonicum. Biochemistry 41: 12952–12958.

Huang, S.H., Rio, D.C., and Marletta, M.A. (2007). Ligand Binding and Inhibition of an Oxygen-Sensitive Soluble Guanylate Cyclase, Gyc-88E, from Drosophila. Biochemistry 46: 15115–15122.

Kumari, P., Kumar, S., Kaur, K., Gupta, U.D., Bhagyawant, S.S., and Tyagi, J.S. (2020). Phosphatase-defective DevS sensor kinase mutants permit constitutive expression of DevR-regulated dormancy genes in Mycobacterium tuberculosis. Biochem. J. 477: 1669–1682.

Lengalova, A., Fojtikova-Proskova, V., Vavra, J., Martínek, V., Stranava, M., Shimizu, T., and Martinkova, M. (2019). Kinetic analysis of a globin-coupled diguanylate cyclase, YddV: Effects of heme iron redox state, axial ligands, and heme distal mutations on catalysis. J. Inorg. Biochem. 201: 110833.

Miyatake, H., Mukai, M., Park, S.-Y., Adachi, S., Tamura, K., Nakamura, H., Nakamura, K., Tsuchiya, T., Iizuka, T., and Shiro, Y. (2000). Sensory mechanism of oxygen sensor FixL from Rhizobium meliloti: crystallographic, mutagenesis and resonance raman spectroscopic studies. J. Mol. Biol. 301: 415–431.

Moskvin, O.V., Kaplan, S., Gilles-Gonzalez, M.-A., and Gomelsky, M. (2007). Novel Heme-based Oxygen Sensor with a Revealing Evolutionary History. J. Biol. Chem. 282: 28740–28748.

Orillard, E., Anaya, S., Johnson, M.S., and Watts, K.J. (2021). Oxygen-Induced Conformational Changes in the PAS-Heme Domain of the Pseudomonas aeruginosa Aer2 Receptor. Biochemistry 60: 2610–2622.

Patterson, D.C., Ruiz, M.P., Yoon, H., Walker, J.A., Armache, J.-P., Yennawar, N.H., and Weinert, E.E. (2021a). Differential ligand-selective control of opposing enzymatic activities within a bifunctional c-di-GMP enzyme. Proc. Natl. Acad. Sci. U.S.A. 118: e2100657118.

Patterson, D.C., Liu, Y., Das, S., Yennawar, N.H., Armache, J.-P., Kincaid, J.R., and Weinert, E.E. (2021b). Heme-Edge Residues Modulate Signal Transduction within a Bifunctional Homo-Dimeric Sensor Protein. Biochemistry 60: 3801–3812.

Petrova, O.N., Yoo, B.-K., Lamarre, I., Selles, J., Nioche, P., and Negrerie, M. (2021). Ultrafast dynamics of heme distortion in the O2-sensor of a thermophilic anaerobe bacterium. Commun. Chem. 4: 31.

Rivera, S., Burns, J.L., Vansuch, G.E., Chica, B., and Weinert, E.E. (2016). Globin domain interactions control heme pocket conformation and oligomerization of globin coupled sensors. J. Inorg. Biochem. 164: 70–76.

Sawai, H., Yoshioka, S., Uchida, T., Hyodo, M., Hayakawa, Y., Ishimori, K., and Aono, S. (2010). Molecular oxygen regulates the enzymatic activity of a heme-containing diguanylate cyclase (HemDGC) for the synthesis of cyclic di-GMP. Biochim et Biophys Acta Proteins Proteom 1804: 166–172.

Sen Santara, S., Roy, J., Mukherjee, S., Bose, M., Saha, R., and Adak, S. (2013). Globin-coupled heme containing oxygen sensor soluble adenylate cyclase in Leishmania prevents cell death during hypoxia. Proc. Natl. Acad. Sci. U.S.A. 110: 16790–16795.

Sousa, E.H.S., Tuckerman, J.R., Gonzalez, G., and Gilles-Gonzalez, M.-A. (2007). DosT and DevS are oxygen-switched kinases in Mycobacterium tuberculosis. Protein Sci. 16: 1708–1719.

Sousa, E.H.S., Diógenes, I.C.N., Lopes, L.G.F., and Moura, J.J.G. (2020). Potential therapeutic approaches for a sleeping pathogen: tuberculosis a case for bioinorganic chemistry. J. Biol. Inorg. Chem. 25: 685–704.

Stranava, M., Man, P., Skálová, T., Kolenko, P., Blaha, J., Fojtikova, V., Martínek, V., Dohnálek, J., Lengalova, A., Rosůlek, M., et al. (2017). Coordination and redox state–dependent structural changes of the heme-based oxygen sensor AfGcHK associated with intraprotein signal transduction. J. Biol. Chem. 292: 20921–20935.

Walker, J.A., Wu, Y., Potter, J.R., and Weinert, E.E. (2020). π-Helix controls activity of oxygen-sensing diguanylate cyclases. Biosci. Rep. 40: BSR20193602.

Wan, X., Saito, J.A., Newhouse, J.S., Hou, S., and Alam, M. (2017). The importance of conserved amino acids in heme-based globin-coupled diguanylate cyclases. PLoS ONE 12: e0182782.

Yamada, S., Akiyama, S., Sugimoto, H., Kumita, H., Ito, K., Fujisawa, T., Nakamura, H., and Shiro, Y. (2006). The Signaling Pathway in Histidine Kinase and the Response Regulator Complex Revealed by X-ray Crystallography and Solution Scattering. J. Mol. Biol. 362: 123–139.

Yan, F., Fojtikova, V., Man, P., Stranava, M., Martínková, M., Du, Y., Huang, D., and Shimizu, T. (2015). Catalytic enhancement of the heme-based oxygen-sensing phosphodiesterase EcDOS by hydrogen sulfide is caused by changes in heme coordination structure. Biometals 28: 637–652.

Zheng, H., Williams, J.T., Aleiwi, B., Ellsworth, E., and Abramovitch, R.B. (2020). Inhibiting Mycobacterium tuberculosis DosRST Signaling by Targeting Response Regulator DNA Binding and Sensor Kinase Heme. ACS Chem. Biol. 15: 52–62.
